# Supplementary material
Source: PubMed Central journal article supplement (PMC2580786)

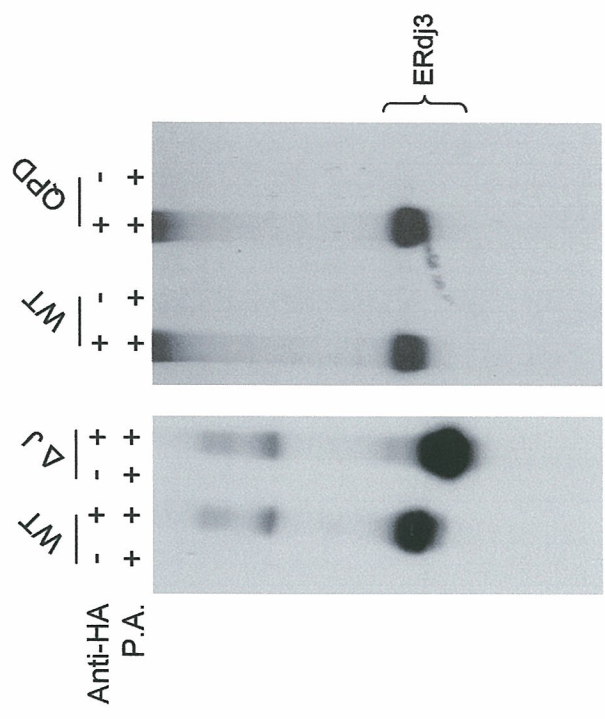

Figure S1

Supplement: emboj2008207s1.pdf [file emboj2008207s1.pdf]

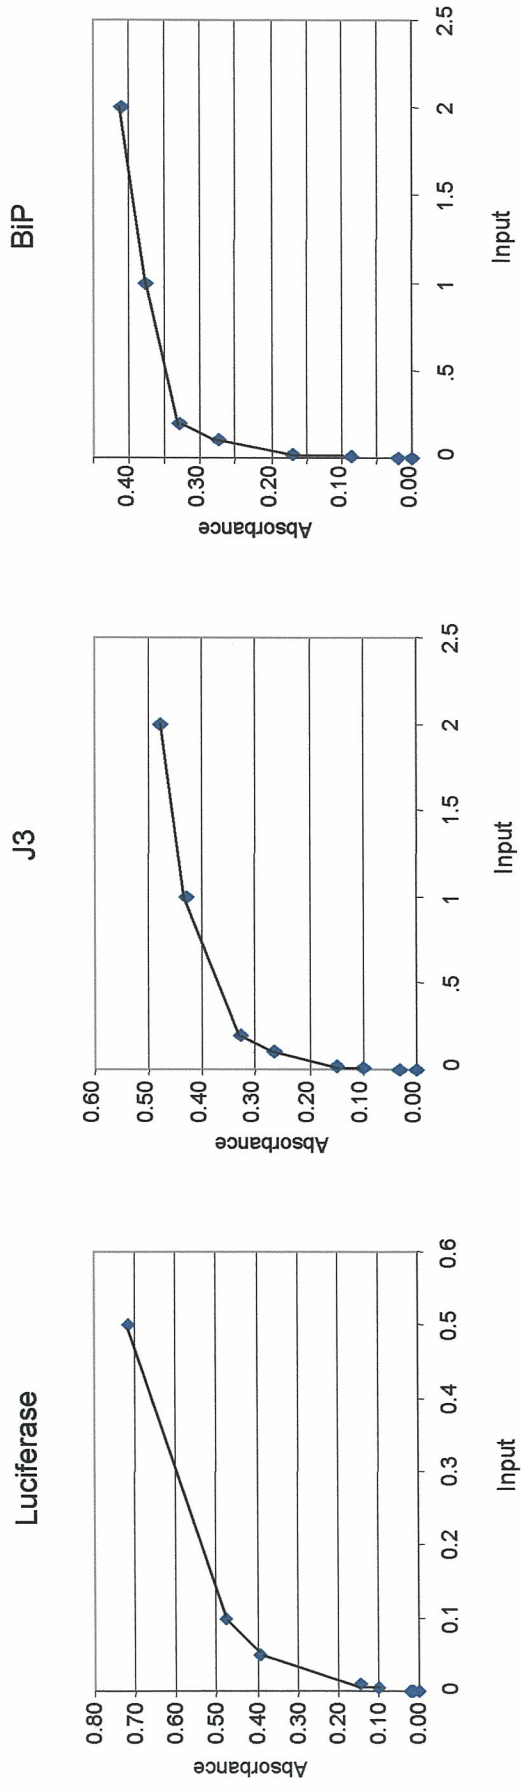

Luciferase – 0.566 = ~ 0.2 μg/well  
 ERdj3 – 0.250 = ~ 0.1 μg/well  
 BiP – 0.141 = ~ 0.02 μg/well

Figure S2

Supplement: emboj2008207s2.pdf [file emboj2008207s2.pdf]

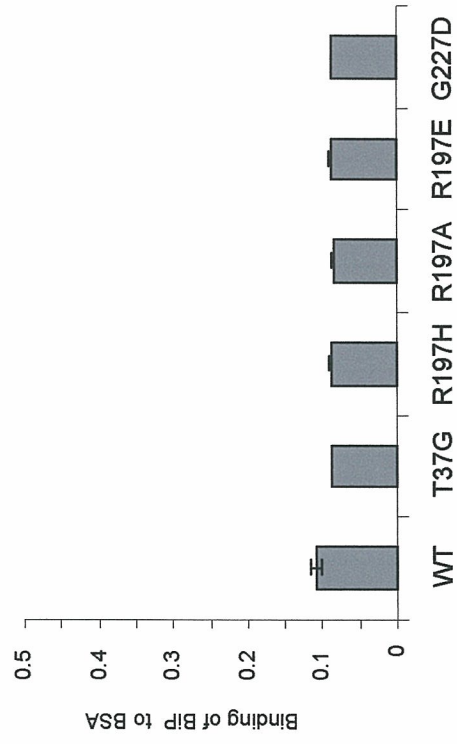

Figure S3

Supplement: emboj2008207s3.pdf [file emboj2008207s3.pdf]

A.

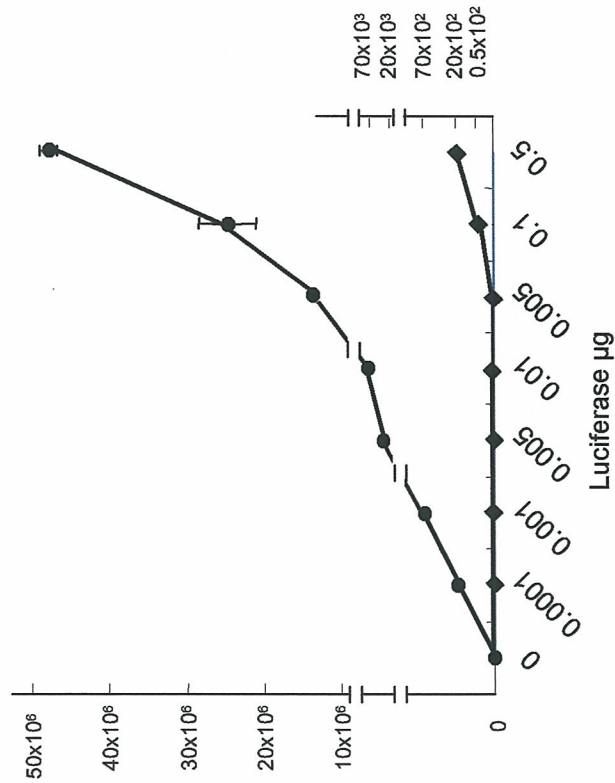

B.

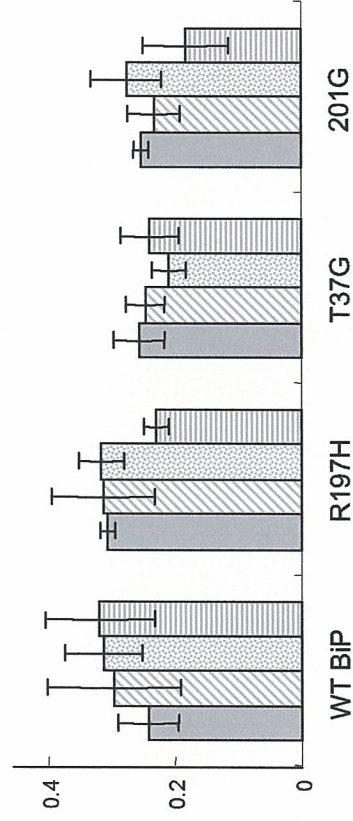

Figure S4

Supplement: emboj2008207s4.pdf [file emboj2008207s4.pdf]

A.

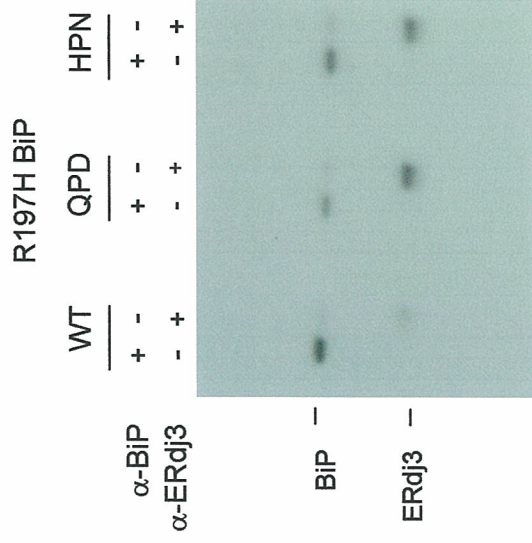

B.

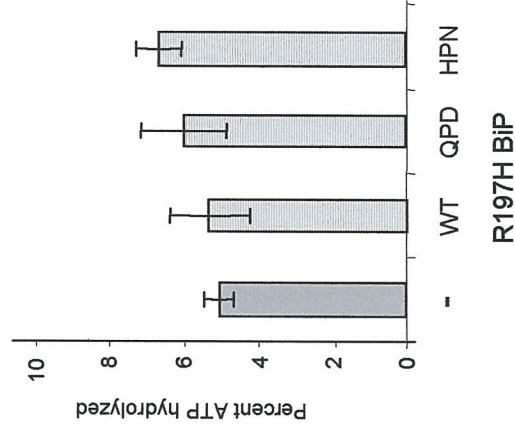

C.

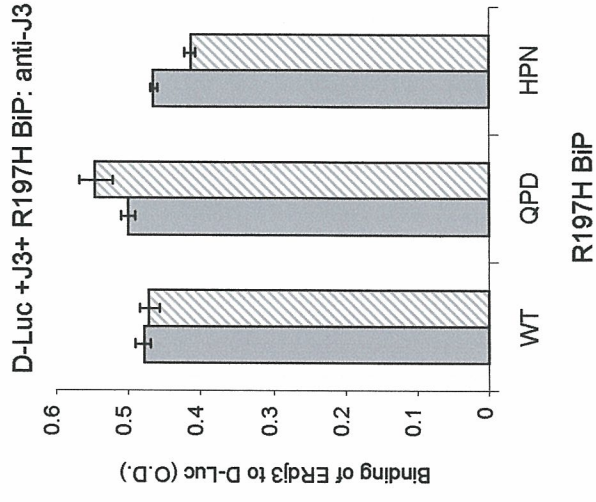

Figure S5

Supplement: emboj2008207s5.pdf [file emboj2008207s5.pdf]
